# Supplementary material for: Sandwich membranes through a two-dimensional confinement strategy for gas separation
Source: Royal Society of Chemistry journal article supplement (doi:10.1039/c8qm00351c), 2018-01-01
Supplement: c8qm00351c1.pdf [file c8qm00351c1.pdf]

## Supporting Information

### Supplementary Figures

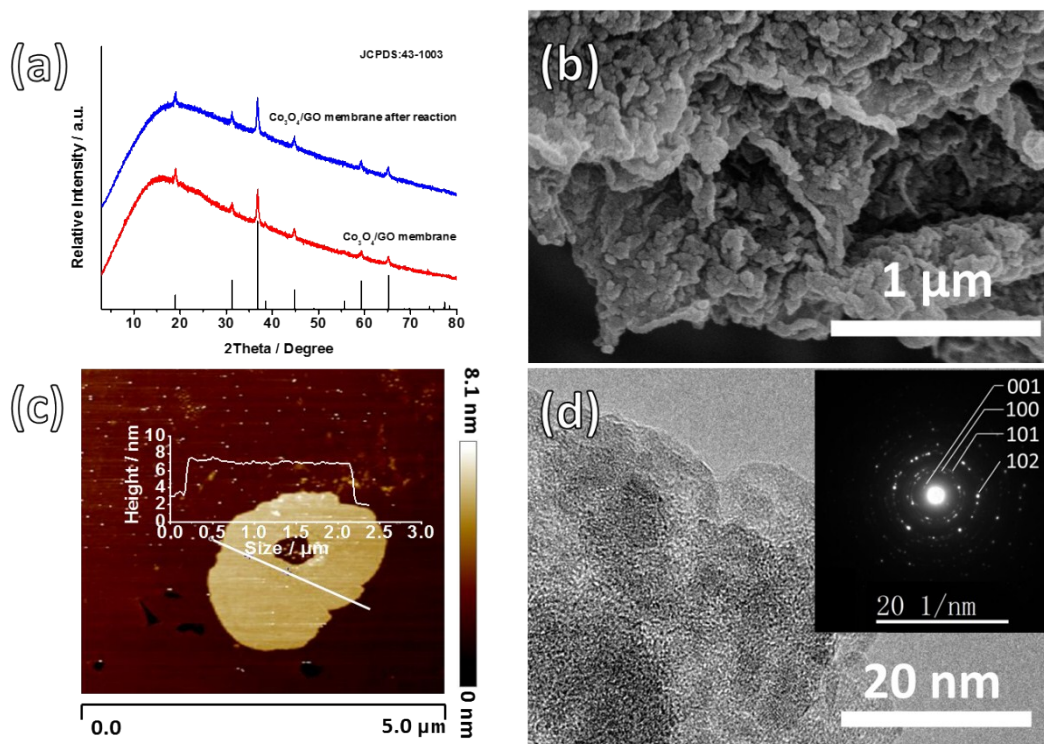

**Figure S1.** (a) PXRD of the Co<sub>3</sub>O<sub>4</sub>/GO membranes before and after reaction with 2-MIM, (b) SEM images of the Co(OH)<sub>2</sub>/GO-I membrane. (c) AFM and (d) TEM images (inset: SAED patterns) of the Co(OH)<sub>2</sub> NS.

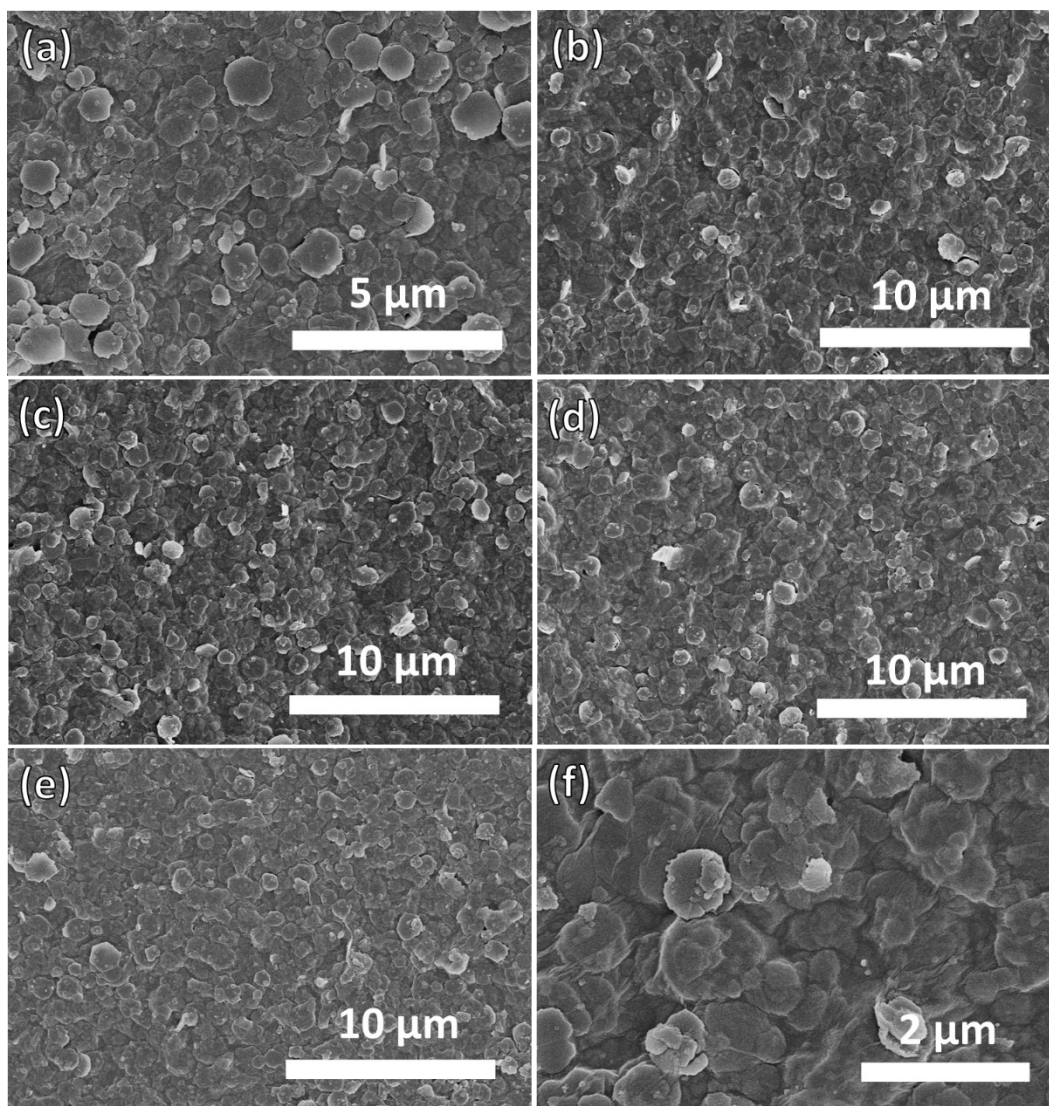

**Figure S2.** Top-view SEM images for the  $\text{Co(OH)}_2/\text{GO-x}$  membranes prepared with varied volume of  $\text{Co(OH)}_2/\text{GO}$  mixtures. (a) 20 mL, (b) 25 mL, (c) 30 mL, (d) 35 mL and (e, f) 40 mL.

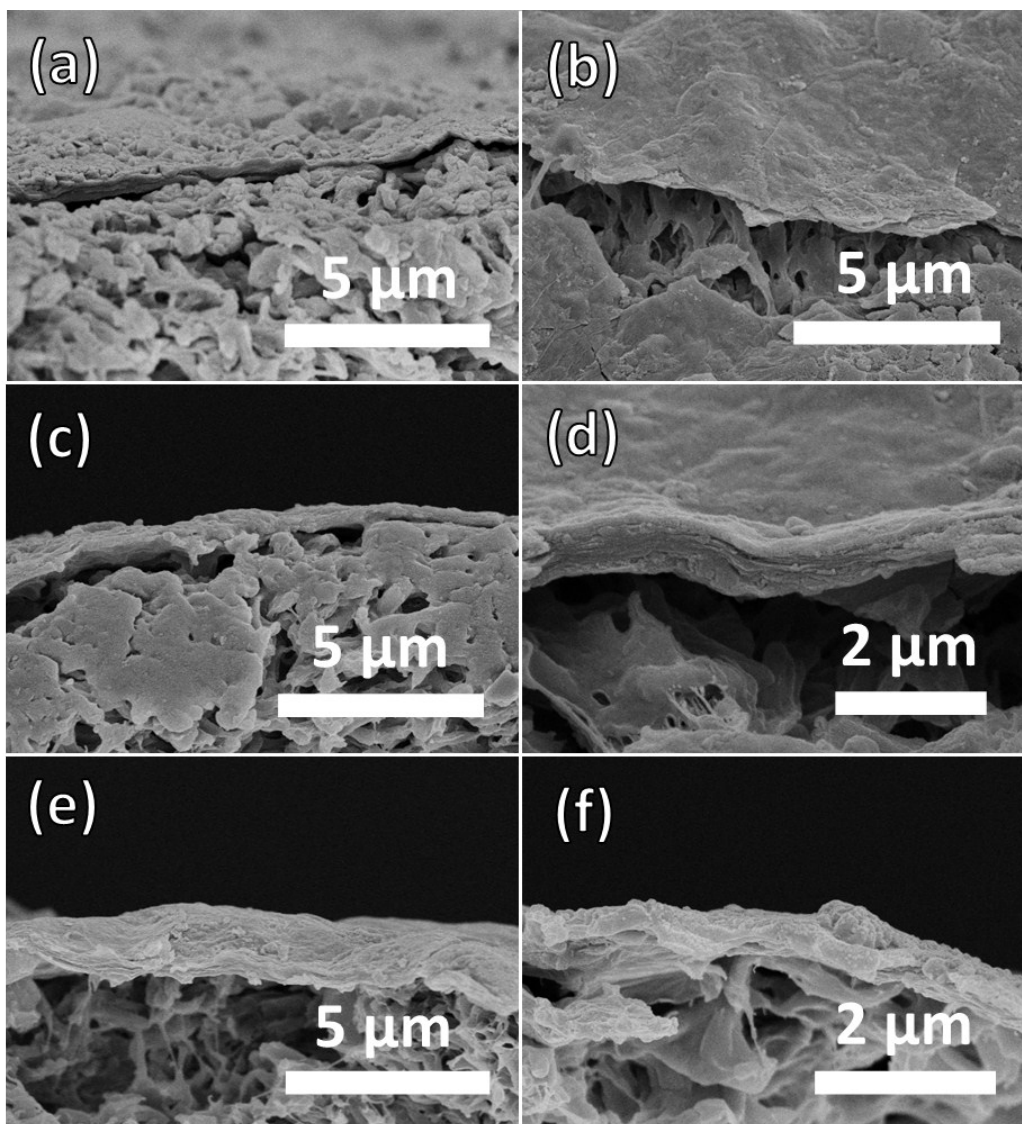

**Figure S3.** Cross-section SEM images for the  $\text{Co(OH)}_2/\text{GO-x}$  membranes prepared with varied volume of  $\text{Co(OH)}_2/\text{GO}$  mixtures. (a) 20 mL, (b) 25 mL, (c) 30 mL, (d) 35 mL and (e, f) 40 mL.

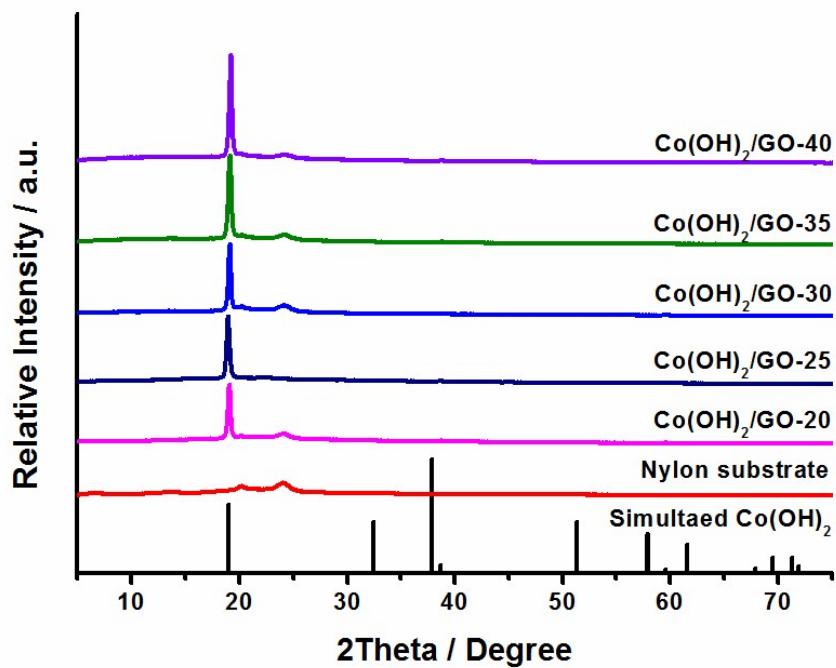

**Figure S4.** PXRD of the Co(OH)<sub>2</sub>/GO-x membranes.

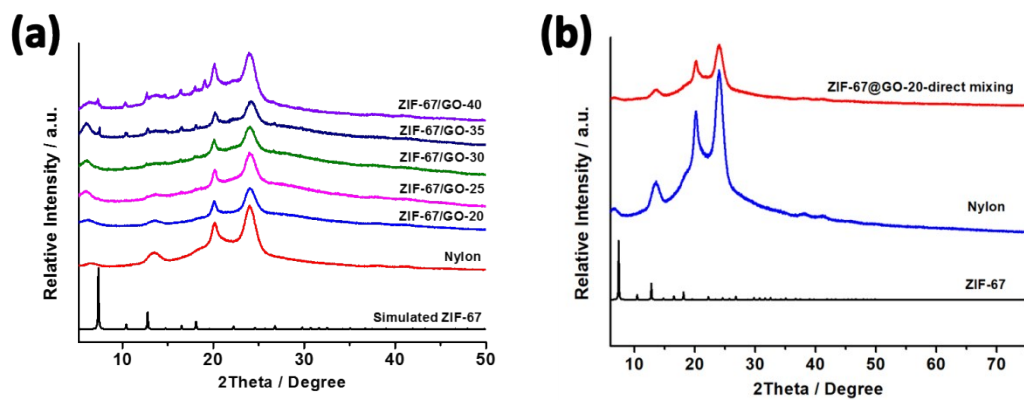

**Figure S5.** PXRD patterns of (a) ZIF-67/GO-x membranes and (b) the membrane by direct mixing ZIF-67 and GO with the same ratio of ZIF-67/GO-20.

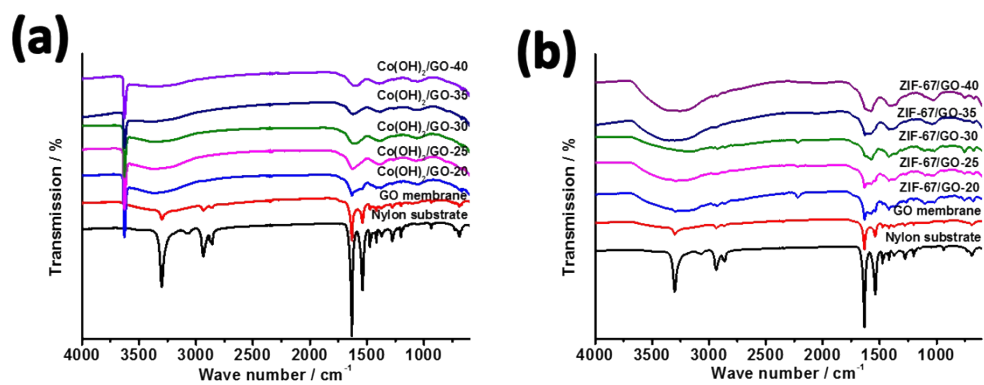

**Figure S6.** FTIR spectra of the Nylon substrate, GO membrane, Co(OH)<sub>2</sub>/GO-x and ZIF-67/GO-x membranes.

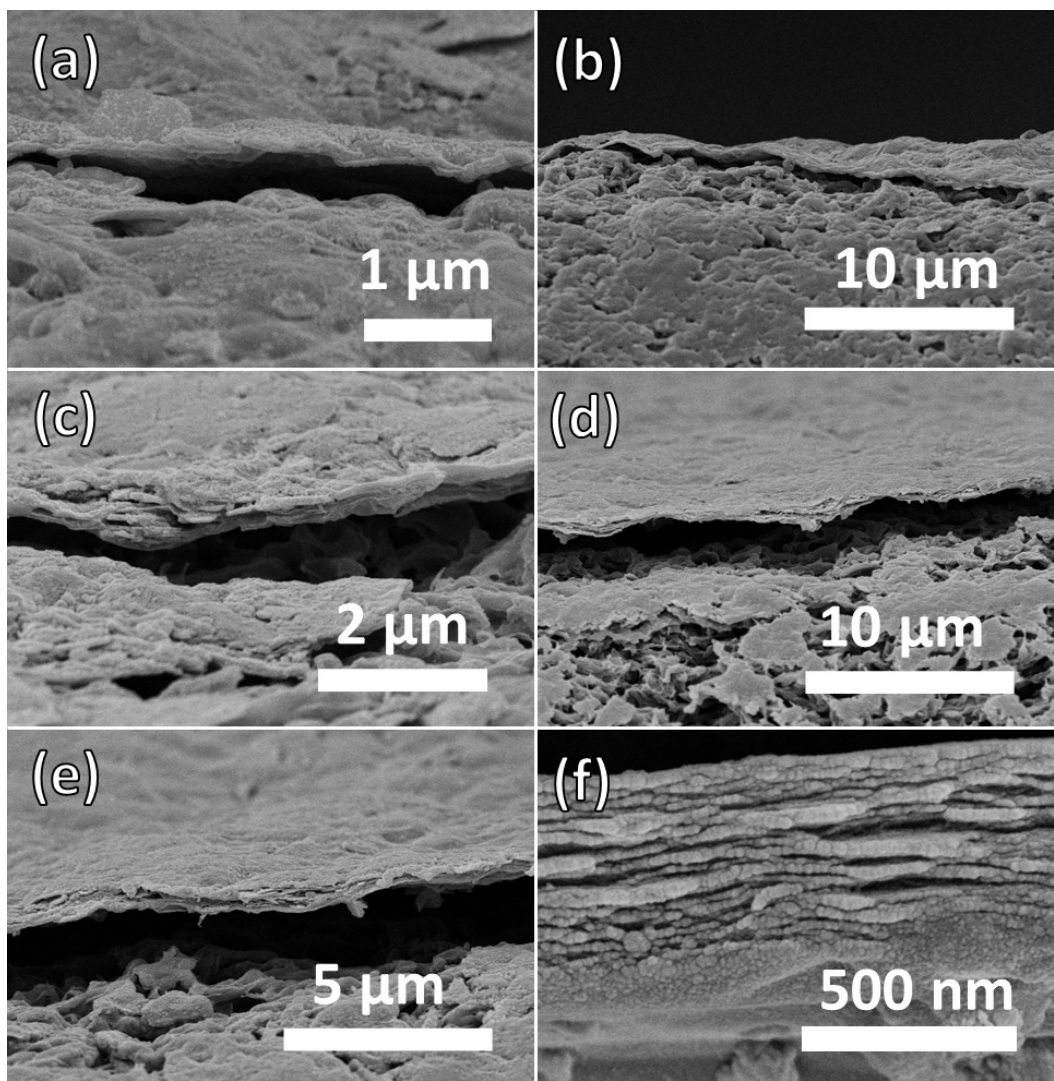

**Figure S7.** Cross-section SEM images for the ZIF-67/GO-x membranes prepared with varied volume of  $\text{Co(OH)}_2/\text{GO}$  mixtures. (a) 20 mL, (b) 25 mL, (c) 30 mL, (d) 35 mL and (e, f) 40 mL.

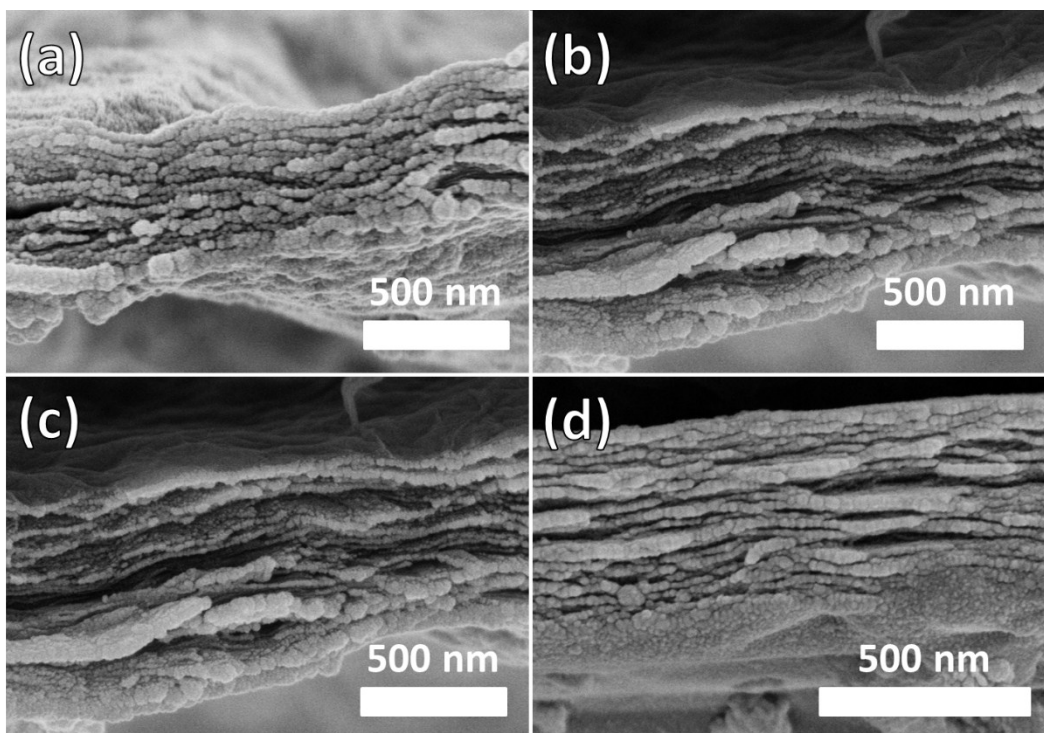

**Figure S8.** Cross-section SEM images of the ZIF-67/GO-40 membranes.



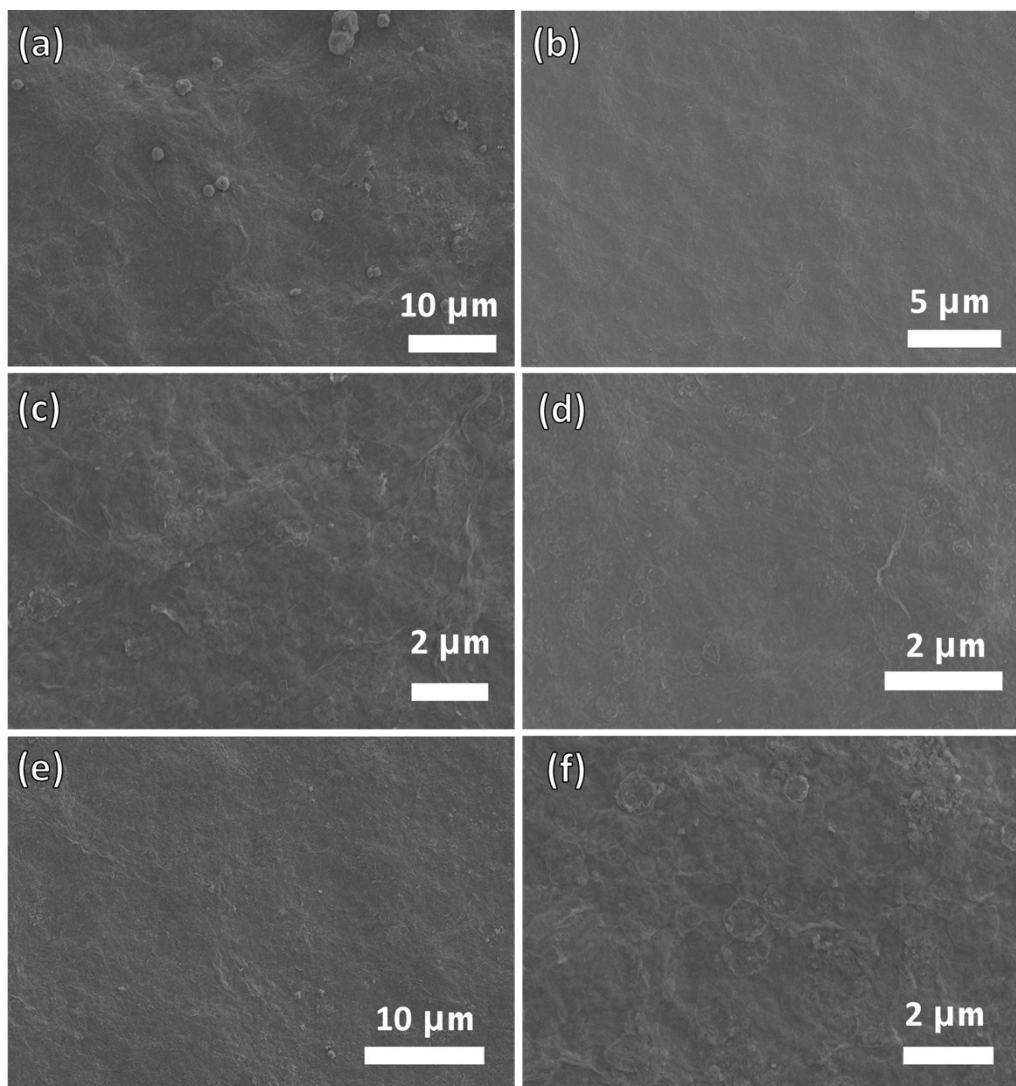

**Figure S9.** Top-view SEM images for the ZIF-67/GO-x membranes prepared with varied volume of  $\text{Co(OH)}_2/\text{GO}$  mixtures. (a) 20 mL, (b) 25 mL, (c) 30 mL, (d) 35 mL and (e, f) 40 mL.

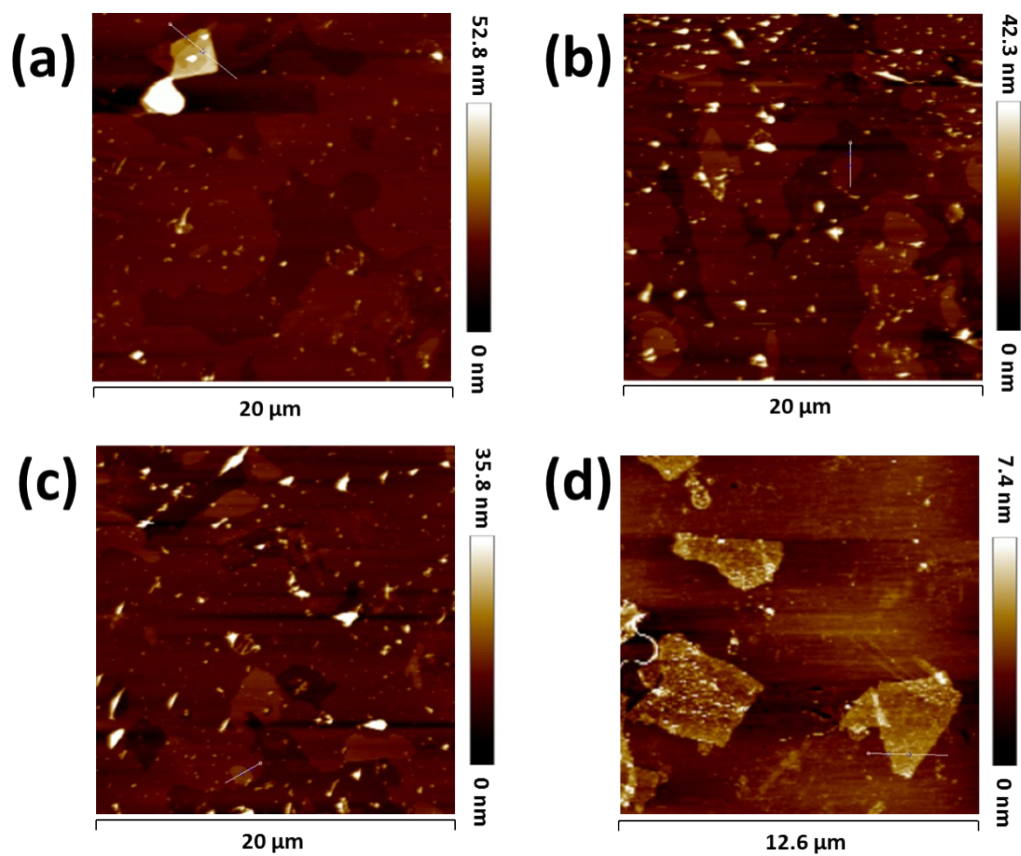

**Figure S10.** AFM images of the samples scraped from ZIF-67/GO-40 membranes. The sample was dispersed in DI water by sonication and dropped on the Si wafer, then dried in the oven.

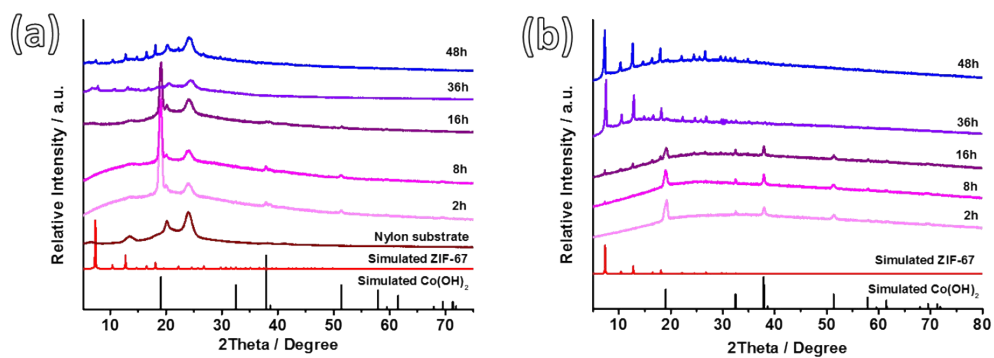

**Figure S11.** PXRD of the samples in the conversion process (a) with and (b) without GO after different time (2h, 8h, 16h, 36h and 48h).

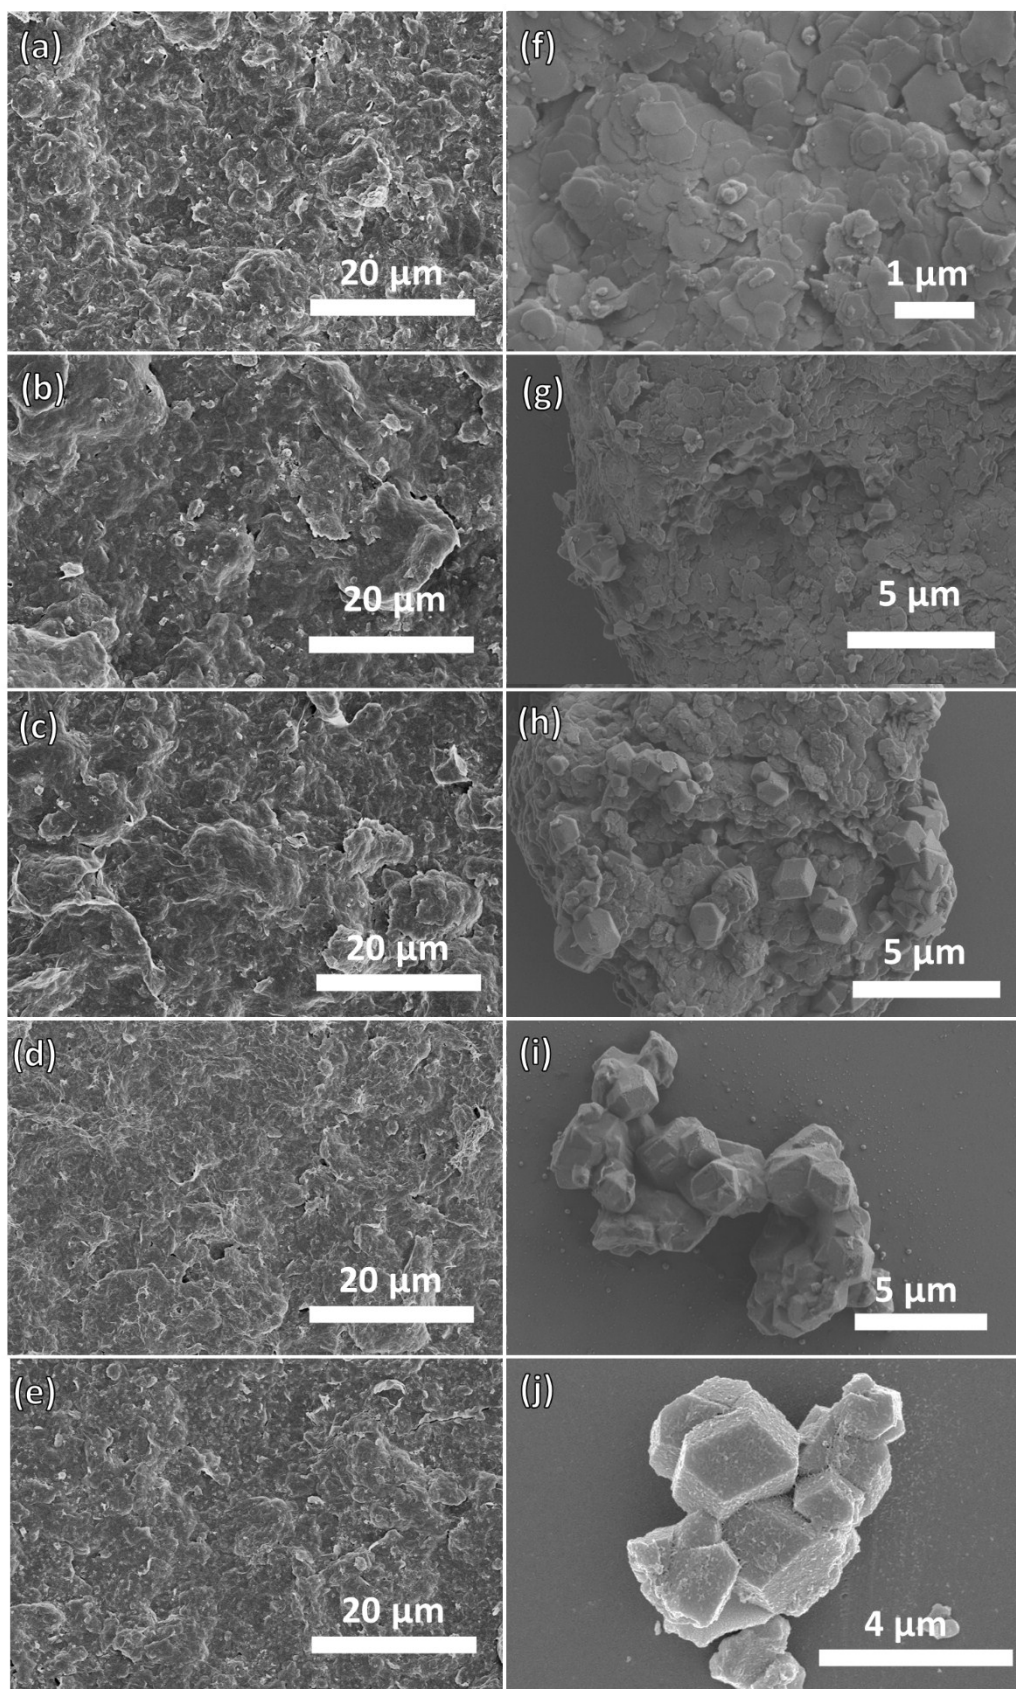

**Figure S12.** SEM images of the samples in the conversion process (a-e) with and (f-j) without GO after different time (2h, 8h, 16h, 36h and 48h).

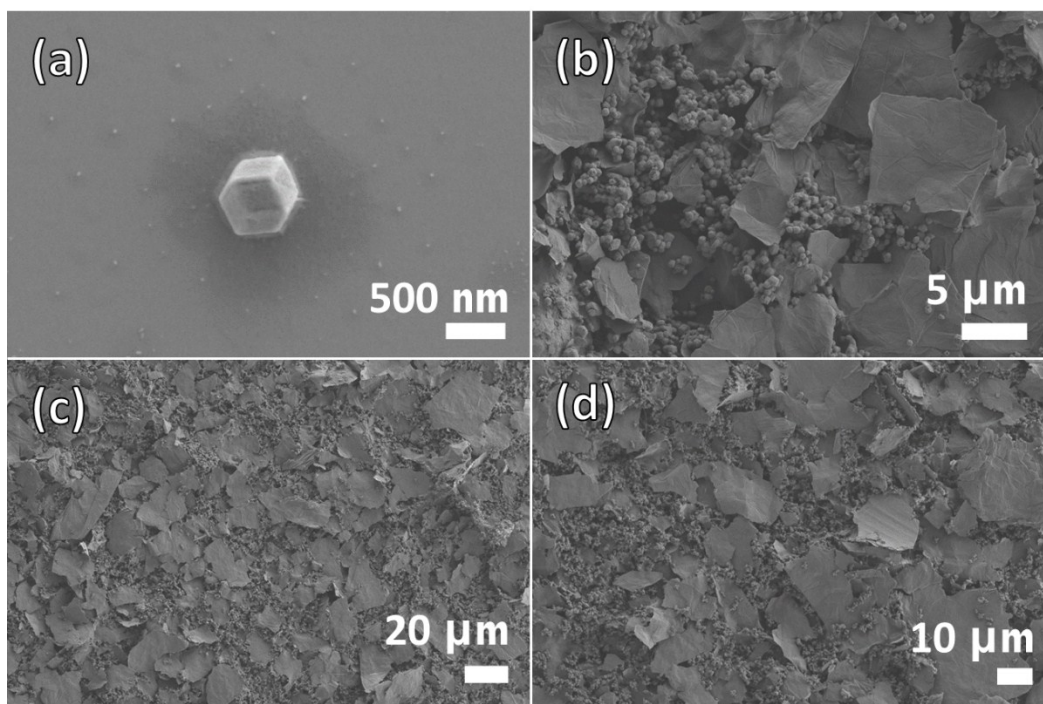

**Figure S13.** SEM images of (a) ZIF-67 NC and ZIF-67/GO-D membranes prepared with different volume of ZIF-67NC/GO mixtures: (b) 20 mL, (c) 30 mL and (d) 40 mL.

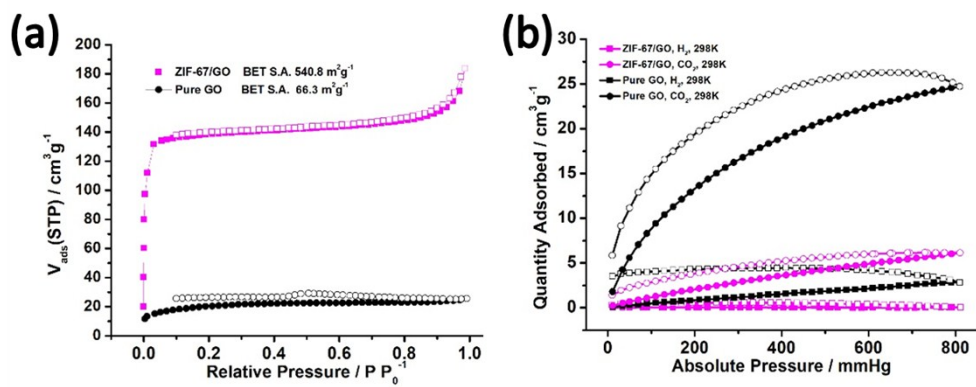

**Figure S14.** (a)  $N_2$  adsorption and desorption isotherm curves for GO and ZIF-67/GO at 77K. (b)  $H_2$  and  $CO_2$  adsorption amount on ZIF-67/GO at 298K.

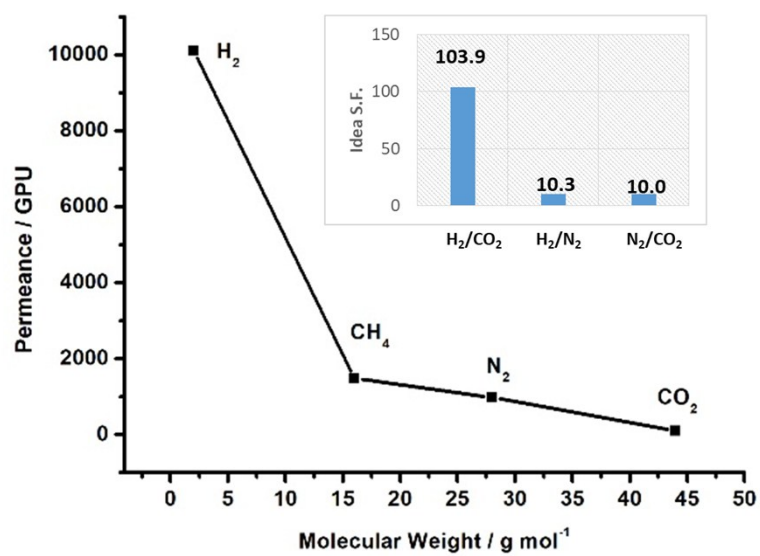

**Figure S15.** Single gas permeance on the ZIF-67/GO-40 membrane.

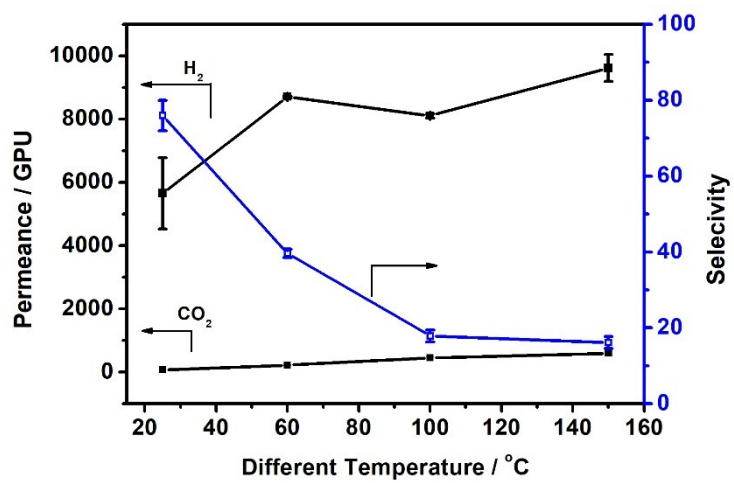

**Figure S16.** The influence of operation temperatures for H<sub>2</sub>/CO<sub>2</sub> mixed gases separation performances on the ZIF-67/GO-40 membranes.



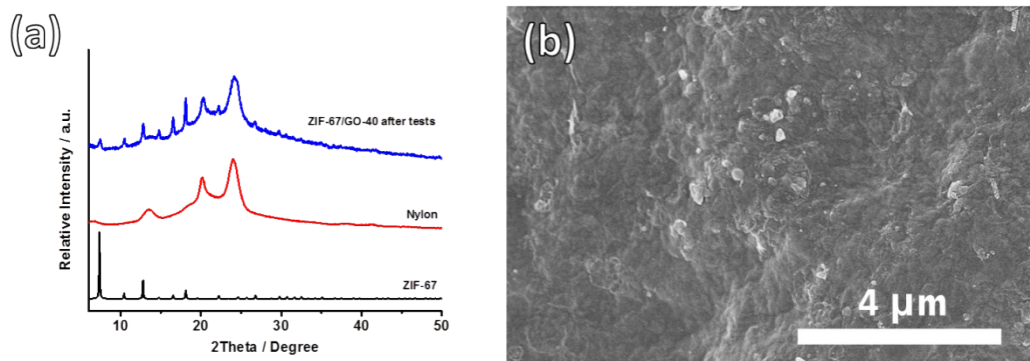

**Figure S17.** (a) PXRD and (b) SEM images of ZIF-67/GO-40 membranes after long time and high temperature tests.

## Supplementary Tables

**Table S1.** Summary of the preparation conditions for the different membranes based on GO

| ID                                      | Doping process                | Metal Precursor                | Precursor/GO ratio | Conversed membrane |
|-----------------------------------------|-------------------------------|--------------------------------|--------------------|--------------------|
| Co(OH) <sub>2</sub> /GO-20 <sup>a</sup> | Physical mixing               | Co(OH) <sub>2</sub>            | 4:1                | ZIF-67/GO-20       |
| Co(OH) <sub>2</sub> /GO-25 <sup>a</sup> | Physical mixing               | Co(OH) <sub>2</sub>            | 4:1                | ZIF-67/GO-25       |
| Co(OH) <sub>2</sub> /GO-30 <sup>a</sup> | Physical mixing               | Co(OH) <sub>2</sub>            | 4:1                | ZIF-67/GO-30       |
| Co(OH) <sub>2</sub> /GO-35 <sup>a</sup> | Physical mixing               | Co(OH) <sub>2</sub>            | 4:1                | ZIF-67/GO-35       |
| Co(OH) <sub>2</sub> /GO-40 <sup>a</sup> | Physical mixing               | Co(OH) <sub>2</sub>            | 4:1                | ZIF-67/GO-40       |
| Co(OH) <sub>2</sub> /GO-50 <sup>a</sup> | Physical mixing               | Co(OH) <sub>2</sub>            | 4:1                | Off the substrate  |
| Co(OH) <sub>2</sub> /GO-A               | Physical mixing               | Co(OH) <sub>2</sub>            | 2:1                | Fail to converse   |
| Co(OH) <sub>2</sub> /GO-B               | Physical mixing               | Co(OH) <sub>2</sub>            | 5:1                | Agglomeration      |
| Co <sub>3</sub> O <sub>4</sub> /GO      | Physical mixing               | Co <sub>3</sub> O <sub>4</sub> | 4:1                | Fail to converse   |
| Co(OH) <sub>2</sub> /GO-I               | <i>In situ</i> growth         | Co(OH) <sub>2</sub>            | 4:1                | Agglomeration      |
| ZIF-67/GO-D                             | Directly mixing ZIF-67 and GO | -                              | -                  | ZIF-67/GO-D        |

a: different volume (x mL) of Co(OH)<sub>2</sub>/GO mixtures were used to prepare membranes

**Table S2.** N 1s and C 1s spectral fitting parameters: binding energies (eV) and corresponding functional groups for ZIF-67 powder and ZIF-67/GO membranes.

| Samples            | Binding energies and functional groups |                               |       |             |
|--------------------|----------------------------------------|-------------------------------|-------|-------------|
|                    | N 1s                                   |                               | C 1s  |             |
| Pure ZIF-67        | 399.3                                  | Co-coordinated<br>Imidazole N | 284.3 | -C=C-/-C-C- |
|                    |                                        |                               | 284.8 | -C-N        |
|                    |                                        |                               | 285.5 | -C=N        |
| ZIF-67/GO membrane | 399.2                                  | Co-coordinated<br>Imidazole N | 284.3 | -C=C-/-C-C- |
|                    | 400.3                                  | H-bonded N                    | 284.8 | -C-N        |
|                    |                                        |                               | 285.3 | -C=N        |
|                    |                                        |                               | 286.5 | -C-OH       |
|                    |                                        |                               | 288.7 | -C=O        |

**Table S3.** Summary of ZIF-67 loading amounts calculated based on ICP results.

| Membrane     | Initial weight<br>(mg) | Co ion amount<br>(mg) | ZIF-67 ratio<br>(%) |
|--------------|------------------------|-----------------------|---------------------|
| ZIF-67/GO-20 | 0.74                   | 0.004783              | 2.57                |
| ZIF-67/GO-25 | 0.37                   | 0.007609              | 8.16                |
| ZIF-67/GO-30 | 1.00                   | 0.02457               | 9.75                |
| ZIF-67/GO-35 | 1.24                   | 0.08109               | 25.96               |
| ZIF-67/GO-40 | 3.35                   | 0.3185                | 37.74               |

**Table S4.** Summary of the concentration of Co ions in the solution after conversion

| Membrane     | ZIF-67 ratio<br>(wt %) | solution volume<br>(mL) | Co ion concentration in the solution<br>after conversion (mgL <sup>-1</sup> ) |
|--------------|------------------------|-------------------------|-------------------------------------------------------------------------------|
| ZIF-67/GO-20 | 2.57                   | 64                      | 6.96                                                                          |
| ZIF-67/GO-40 | 37.74                  | 61                      | 13.43                                                                         |

**Table S5.** H<sub>2</sub>/CO<sub>2</sub> mixed gas permeation results from the different membranes of ZIF-67@GO-40

| Membrane ID | H <sub>2</sub> permeance (GPU) | CO <sub>2</sub> permeance (GPU) | Selectivity |
|-------------|--------------------------------|---------------------------------|-------------|
| M1          | 6773                           | 94                              | 72          |
| M2          | 5302                           | 67                              | 79          |
| M3          | 4922                           | 65                              | 75          |
| M4          | 5837                           | 81                              | 72          |
| M5          | 6776                           | 90                              | 75          |

**Table S6.** Summary of H<sub>2</sub>/CO<sub>2</sub> mixed gases separation performances on the membranes from this work and references

| Membrane                           | Temperature (°C) | H <sub>2</sub> Permeance (GPU) | Selectivity (H <sub>2</sub> /CO <sub>2</sub> ) | Ref.      |
|------------------------------------|------------------|--------------------------------|------------------------------------------------|-----------|
| GO                                 | 25               | 1002                           | 240                                            | [1]       |
| GO                                 | 25               | 840                            | 33                                             | [2]       |
| MoS <sub>2</sub>                   | 35               | 2446                           | 4.6                                            | [3]       |
| Zn <sub>2</sub> (Bim) <sub>4</sub> | 25               | 2700                           | 291                                            | [4]       |
| Zn <sub>2</sub> (Bim) <sub>4</sub> | 25               | 2927                           | 109                                            | [4]       |
| MAMS-1                             | 40               | 881                            | 225                                            | [5]       |
| MAMS-1                             | 20               | 6131                           | 40                                             | [5]       |
| ZIF-8@rGO                          | 170              | 5718                           | 26.4                                           | [6]       |
| ZIF-8@GO                           | 250              | 383                            | 14.9                                           | [7]       |
| ZIF-8/GO                           | 25               | 91                             | 406                                            | [8]       |
| ZIF-67                             | 25               | 433                            | 8.2 <sup>a</sup>                               | [9]       |
| ZIF-67/ZIF-9                       | 150              | 212                            | 8                                              | [10]      |
| GO                                 | 25               | 9093±110 <sup>b</sup>          | 9.3±0.5                                        | this work |
| ZIF-67/GO-40                       | 25               | 5922±1000 <sup>c</sup>         | 75±4                                           | this work |
| ZIF-67/GO-40                       | 150 <sup>d</sup> | 3625±252 <sup>e</sup>          | 31±3                                           | this work |

a ideal separation factors, b CO<sub>2</sub> permeance: 979±22 GPU, c CO<sub>2</sub> permeance: 79±15 GPU, d feed gas containing ~4 mol% water vapor, e CO<sub>2</sub> permeance: 119±19 GPU.

## Supplementary References

- [1] C. Chi, X. Wang, Y. Peng, Y. Qian, Z. Hu, J. Dong, D. Zhao, *Chem. Mater.* **2016**, 28, 2921.
- [2] J. Shen, G. Liu, K. Huang, Z. Chu, W. Jin, N. Xu, *ACS nano* **2016**, 10, 3398.
- [3] D. Wang, Z. Wang, L. Wang, L. Hu, J. Jin, *Nanoscale* **2015**, 7, 17649.
- [4] Y. L. Yuan Peng, Yujie Ban, Hua Jin, Wenmei Jiao, Xinlei Liu, Weishen Yang, *Science* **2014**, 346, 1356.
- [5] X. Wang, C. Chi, K. Zhang, Y. Qian, K. M. Gupta, Z. Kang, J. Jiang, D. Zhao, *Nat Commun* **2017**, 8, 14460.
- [6] W. Li, Y. Zhang, P. Su, Z. Xu, G. Zhang, C. Shen, Q. Meng, *J. Mater. Chem. A* **2016**, 4, 18747.
- [7] A. Huang, Q. Liu, N. Wang, Y. Zhu, J. Caro, *J. Am. Chem. Soc.* **2014**, 136, 14686.
- [8] X. Wang, C. Chi, J. Tao, Y. Peng, S. Ying, Y. Qian, J. Dong, Z. Hu, Y. Gu, D. Zhao, *Chem. Commun.* **2016**, 52, 8087.
- [9] S. Zhou, Y. Wei, L. Zhuang, L.-X. Ding, H. Wang, *J. Mater. Chem. A* **2017**, 5, 1948.
- [10] F. Cacho-Bailo, I. Matito-Martos, J. Perez-Carbajo, M. Etxebarria-Benavides, O. Karvan, V. Sebastian, S. Calero, C. Tellez, J. Coronas, *Chemical science* **2017**, 8, 325.
